# Supplementary material
Source: Research Square preprint supplement (doi:10.21203/rs.3.rs-9494805/v1)
Supplement: Supplementary file 1 [file 24943b3bf479085794941cd8.docx]

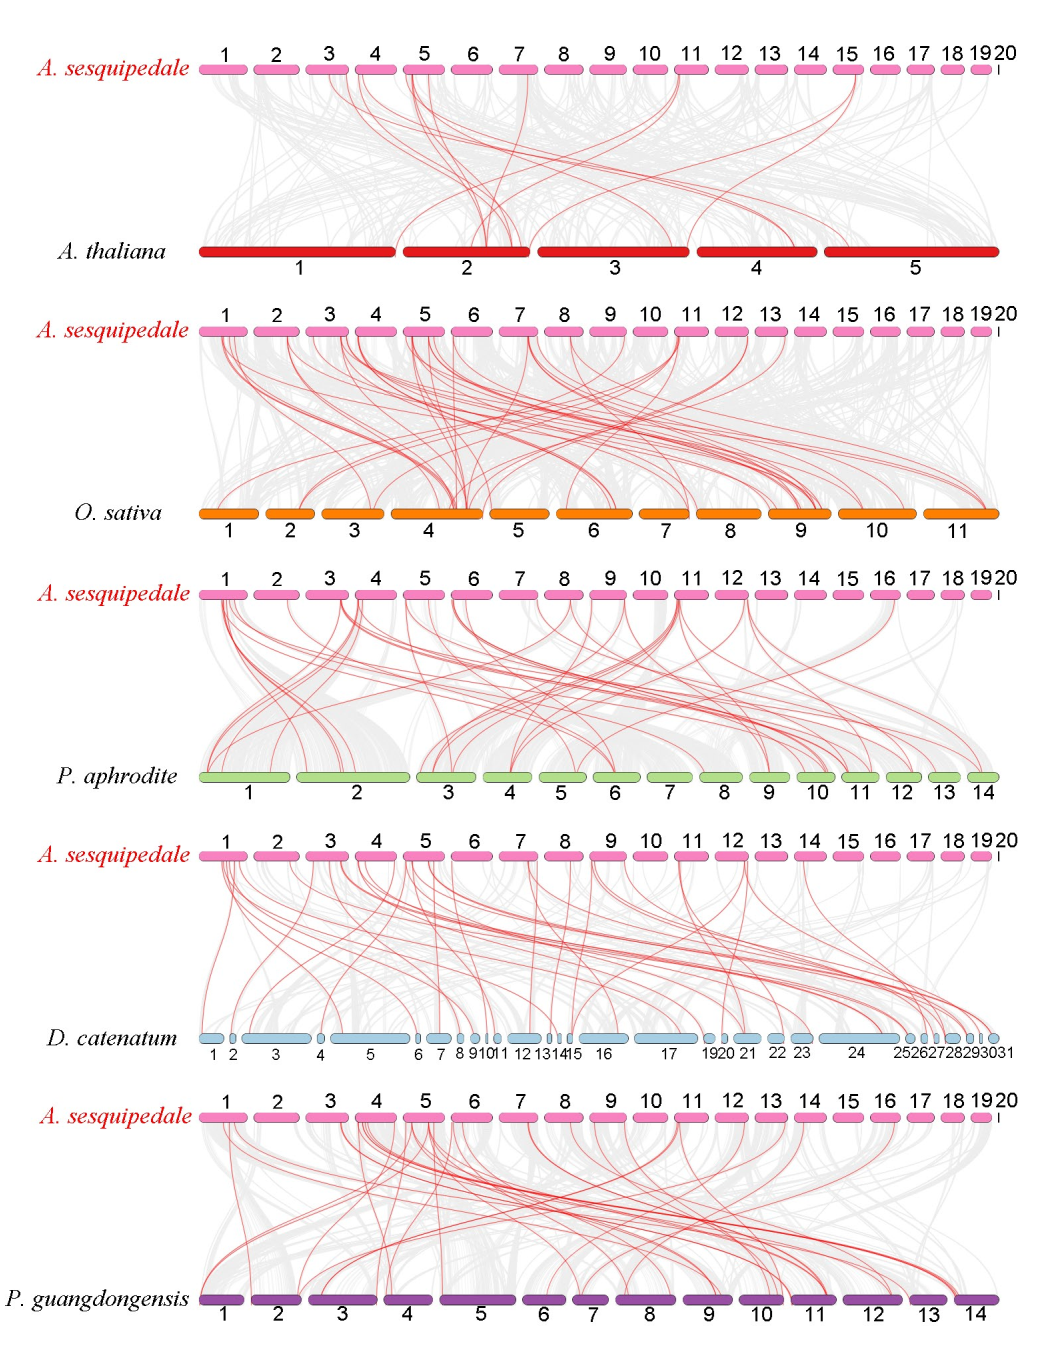


**Figure S1.** Synteny analysis of WRKYs between *A. sesquipedale* and other plant species. The collinear blocks are marked by gray lines, while the collinear gene pairs with WRKY genes are highlighted in the red lines.


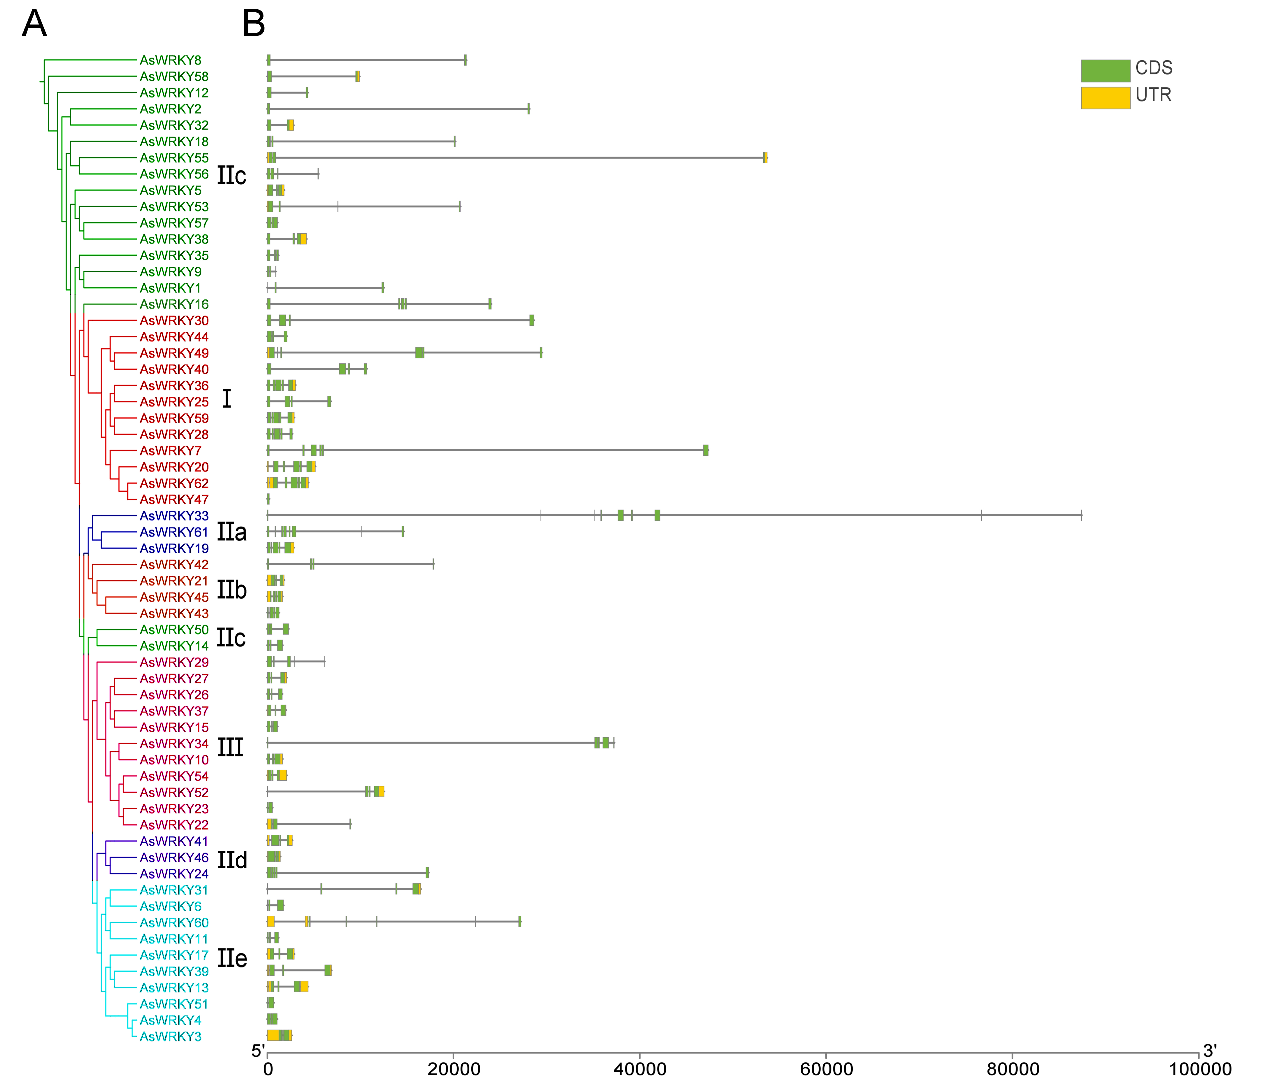


**Figure S2.** Gene structure distribution of 62 *AsWRKY* genes. (**A)** The phylogenetic tree of 62 *AsWRKY* genes was constructed using the identical parameters described in Figure 5. (**B)** Gene structures of 62 *AsWRKY* genes, in which exons and UTRs are represented by yellow and green bars, respectivel.

**Table S1.** qRT-PCR primer sequences and product lengths.

| **Gene ID** | **Primer name** | **Primer sequence** | **Product lengths (bp)** |
| --- | --- | --- | --- |
| *As-actin* | *As-Actin-F* | GGGATGATATGGAGAAA | 296 |
| *As-Actin-R* | CCTAAGAATTGCGTGT |
| *AsWRKY4* | *AsWRKY4-F* | AGCCAAAGCCGTCTCC | 232 |
| *AsWRKY4-R* | CCCTTGATGGGTTTCTGT |
| *AsWRKY15* | *AsWRKY15-F* | GAAGTATGGGCAGAAAG | 295 |
| *AsWRKY15-R* | ATTGAAGGAGGTGAGGT |
| *AsWRKY19* | *AsWRKY19-F* | GTTGGATGAGGGTATGTC | 212 |
| *AsWRKY19-R* | CAAGTGGGAAGTTGTTTT |
| *AsWRKY21* | *AsWRKY21-F* | AAAGCGTAAGATTCCTG | 176 |
| *AsWRKY21-R* | CATACTTCCTCCATTGATA |
| *AsWRKY23* | *AsWRKY23-F* | CCGCATGAAGAACGCACAG | 149 |
| *AsWRKY23-R* | TCCAAGCCCGACCAGCA |
| *AsWRKY28* | *AsWRKY28-F* | GAACTCACAGCCACCCTA | 297 |
| *AsWRKY28-R* | CACCGTCGTTATCTCCC |
| *AsWRKY30* | *AsWRKY30-F* | ACAAGTGGCGTAAGTATGG | 201 |
| *AsWRKY30-R* | CGATGGCAGTTGGAAGA |
| *AsWRKY34* | *AsWRKY34-F* | AGAATCAAGACCCAACC | 253 |
| *AsWRKY34-R* | ATCGGCGAATCTATCAA |
| *AsWRKY35* | *AsWRKY35-F* | AGACGGACGAGGATAAT | 259 |
| *AsWRKY35-R* | GAACCCGATAAGTGAAA |
| *AsWRKY38* | *AsWRKY38-F* | ATTGTAAAGAAGCGTGTTG | 203 |
| *AsWRKY38-R* | GCTGTAGTCGCCTGAAA |
| *AsWRKY41* | *AsWRKY41-F* | GGTGGAGGCGGCTAATA | 205 |
| *AsWRKY41-R* | ATGCGGAGATGGTTTCG |
| *AsWRKY46* | *AsWRKY46-F* | GCTCGCAGCCTACAAGA | 134 |
| *AsWRKY46-R* | GAACCCGAATCGTCCTC |
| *AsWRKY52* | *AsWRKY52-F* | CCAGCAAAGTTCAGTCT | 210 |
| *AsWRKY52-R* | TATGCCCATCATCTATT |
| *AsWRKY54* | *AsWRKY54-F* | CCAAGGCAACGAAGATA | 141 |
| *AsWRKY54-R* | CTGGCTGGCTCAAGTAG |
| *AsWRKY55* | *AsWRKY55-F* | TAGAAGGAAGATAAGGGAG | 123 |
| *AsWRKY55-R* | CTTGGGTGCTGAGTGTT |
| *AsWRKY57* | *AsWRKY57-F* | CTCACCCAAGCCCAATA | 293 |
| *AsWRKY57-R* | CTCCCTCTTCATCATCACC |
| *AsWRKY60* | *AsWRKY60-F* | CTCCGTCTTATCTGGT | 115 |
| *AsWRKY60-R* | CTTGAGTTGGGTTTGA |

**Table S2.** Physicochemical properties and subcellular localization predictions of *AsWRKY* genes.

| **gene ID** | **sequence** | **Group** | **Number of Amino Acid** | **Molecular Weight** | **Theoretical pI** | **Instability Index** | **Aliphatic Index** | **Grand Average of Hydropathicity** | **Subcellular Localization** |
| --- | --- | --- | --- | --- | --- | --- | --- | --- | --- |
| AsWRKY1 | ASE01G00403 | IIc | 117 | 13641.4 | 9.48 | 51.91 | 52.39 | -1.004 | Cytoplasm |
| AsWRKY2 | ASE01G00448 | IIc | 145 | 16399.63 | 9.26 | 51.3 | 57.72 | -0.733 | Nucleus |
| AsWRKY3 | ASE01G00462 | IIe | 301 | 32819.32 | 5.37 | 59.81 | 49.4 | -0.702 | Nucleus |
| AsWRKY4 | ASE01G00463 | IIe | 308 | 33723.45 | 5.49 | 63.28 | 51.75 | -0.693 | Nucleus |
| AsWRKY5 | ASE01G00613 | IIc | 316 | 35061.7 | 6.52 | 61.39 | 46.93 | -0.833 | Nucleus |
| AsWRKY6 | ASE01G00766 | IIe | 275 | 29645.52 | 5.3 | 67.03 | 49.13 | -0.784 | Nucleus |
| AsWRKY7 | ASE01G01171 | I | 592 | 64081.68 | 5.97 | 51.7 | 63.6 | -0.658 | Nucleus |
| AsWRKY8 | ASE01G01456 | IIc | 162 | 19129.81 | 9.34 | 43.37 | 57.72 | -1.041 | Nucleus |
| AsWRKY9 | ASE02G01119 | IIc | 126 | 14436.05 | 9.55 | 33.42 | 64.92 | -0.918 | Nucleus |
| AsWRKY10 | ASE02G01178 | III | 320 | 35933.92 | 4.8 | 55.01 | 64.28 | -0.628 | Nucleus |
| AsWRKY11 | ASE03G00301 | IIe | 229 | 25842.39 | 8.73 | 55.51 | 68.17 | -0.786 | Nucleus |
| AsWRKY12 | ASE03G00552 | IIc | 201 | 22930.29 | 8.77 | 36.22 | 64.48 | -1.047 | Nucleus |
| AsWRKY13 | ASE03G01109 | IIe | 324 | 35812.85 | 6.67 | 60.68 | 54.2 | -0.79 | Nucleus |
| AsWRKY14 | ASE03G01227 | IIc | 302 | 34193.61 | 6.26 | 50.69 | 70.66 | -0.618 | Nucleus |
| AsWRKY15 | ASE03G01626 | III | 270 | 30707.43 | 5.62 | 59.11 | 64 | -0.736 | Nucleus |
| AsWRKY16 | ASE03G01689 | I | 384 | 43163.34 | 5.56 | 46.43 | 69.53 | -0.696 | Nucleus |
| AsWRKY17 | ASE04G00195 | IIe | 353 | 38836.02 | 5.5 | 49.24 | 56.37 | -0.739 | Nucleus |
| AsWRKY19 | ASE04G00437 | IIb | 554 | 59485.63 | 6.71 | 50.73 | 63.54 | -0.53 | Nucleus |
| AsWRKY20 | ASE04G00523 | I | 637 | 69686.93 | 5.64 | 57.48 | 57 | -0.763 | Nucleus |
| AsWRKY21 | ASE04G00602 | IIa | 277 | 29944.69 | 7.55 | 46.61 | 67.65 | -0.555 | Nucleus |
| AsWRKY22 | ASE04G01204 | III | 198 | 22189.82 | 5.05 | 63.88 | 58.13 | -0.599 | Nucleus |

**Table S2.** Physicochemical properties and subcellular localization predictions of *AsWRKY* genes (continued 1).

| **gene ID** | **sequence** | **Group** | **Number of Amino Acid** | **Molecular Weight** | **Theoretical pI** | **Instability Index** | **Aliphatic Index** | **Grand Average of Hydropathicity** | **Subcellular Localization** |
| --- | --- | --- | --- | --- | --- | --- | --- | --- | --- |
| AsWRKY23 | ASE04G01206 | III | 165 | 18962.64 | 10.17 | 56.82 | 63.27 | -0.548 | Chloroplast |
| AsWRKY24 | ASE05G00225 | IId | 362 | 40641.85 | 9.71 | 50.76 | 77.29 | -0.444 | Cytoplasm |
| AsWRKY25 | ASE05G00551 | I | 445 | 49942.28 | 8.95 | 50.52 | 48.65 | -0.905 | Nucleus |
| AsWRKY26 | ASE05G00584 | III | 265 | 29694.42 | 5.93 | 68.01 | 75.13 | -0.494 | Nucleus |
| AsWRKY27 | ASE05G00585 | III | 262 | 28877.32 | 6.59 | 58.15 | 63.4 | -0.54 | Nucleus |
| AsWRKY28 | ASE05G00930 | I | 494 | 54095.19 | 7.69 | 54.26 | 52.15 | -0.864 | Nucleus |
| AsWRKY29 | ASE05G01101 | III | 313 | 33643.62 | 5.9 | 59.36 | 74.28 | -0.318 | Nucleus |
| AsWRKY30 | ASE06G00055 | I | 556 | 59852.61 | 6.46 | 51.63 | 65.47 | -0.705 | Nucleus |
| AsWRKY31 | ASE06G00148 | IIe | 316 | 34665.04 | 7.09 | 52.01 | 69.3 | -0.522 | Chloroplast |
| AsWRKY32 | ASE06G00160 | IIc | 190 | 21402.28 | 9.26 | 44.95 | 67.21 | -0.684 | Nucleus |
| AsWRKY33 | ASE06G00423 | IIb | 485 | 53857.46 | 7.54 | 56.07 | 63.61 | -0.692 | Nucleus |
| AsWRKY34 | ASE06G00487 | III | 400 | 44991.47 | 5.63 | 45.38 | 65.35 | -0.633 | Nucleus |
| AsWRKY35 | ASE06G00562 | IIc | 221 | 24764.42 | 5.12 | 45.62 | 62.67 | -0.649 | Chloroplast |
| AsWRKY36 | ASE07G00718 | I | 555 | 62329.54 | 8.51 | 60.07 | 52.7 | -0.881 | Nucleus |
| AsWRKY37 | ASE07G00760 | III | 297 | 32874.48 | 5.2 | 50.62 | 61.41 | -0.608 | Nucleus |
| AsWRKY38 | ASE07G01323 | IIc | 254 | 27555.56 | 6.08 | 54.83 | 57.2 | -0.728 | Nucleus |
| AsWRKY39 | ASE08G00529 | IIe | 393 | 43640.57 | 6.29 | 55.15 | 53.18 | -0.826 | Nucleus |
| AsWRKY40 | ASE09G00203 | I | 502 | 54552.03 | 6.84 | 57.91 | 60.48 | -0.791 | Nucleus |
| AsWRKY41 | ASE09G00364 | IId | 340 | 37658.65 | 9.97 | 57.05 | 66.32 | -0.756 | Nucleus |
| AsWRKY42 | ASE09G01276 | IIa | 164 | 18544.6 | 6.95 | 44.98 | 106.95 | -0.03 | Plasma Membrane |

**Table S2.** Physicochemical properties and subcellular localization predictions of *AsWRKY* genes (continued 2).

| **gene ID** | **sequence** | **Group** | **Number of Amino Acid** | **Molecular Weight** | **Theoretical pI** | **Instability Index** | **Aliphatic Index** | **Grand Average of Hydropathicity** | **Subcellular Localization** |
| --- | --- | --- | --- | --- | --- | --- | --- | --- | --- |
| AsWRKY43 | ASE09G01277 | IIa | 312 | 34629.67 | 8.95 | 55.7 | 65.93 | -0.743 | Nucleus |
| AsWRKY44 | ASE11G00222 | I | 296 | 33010.79 | 9.06 | 38.92 | 60.57 | -0.974 | Nucleus |
| AsWRKY45 | ASE11G00289 | IIa | 240 | 26270.49 | 6.35 | 51.36 | 72.42 | -0.539 | Nucleus |
| AsWRKY46 | ASE11G00380 | IId | 331 | 35453.54 | 9.76 | 48.81 | 73.17 | -0.312 | Nucleus |
| AsWRKY47 | ASE11G00877 | I | 73 | 8481.69 | 9.07 | 29.86 | 53.42 | -0.774 | Nucleus |
| AsWRKY48 | ASE11G00976 | I | 627 | 69104.42 | 5.45 | 54.76 | 59.11 | -0.636 | Nucleus |
| AsWRKY49 | ASE12G00803 | I | 554 | 59693.79 | 7.71 | 52.93 | 68 | -0.577 | Nucleus |
| AsWRKY50 | ASE12G01033 | IIc | 325 | 36911.56 | 6.34 | 60.19 | 74.68 | -0.797 | Nucleus |
| AsWRKY51 | ASE13G00726 | IIe | 208 | 22658.02 | 4.76 | 44.71 | 60 | -0.748 | Nucleus |
| AsWRKY52 | ASE13G00824 | III | 302 | 34304.39 | 6.42 | 57.8 | 58.48 | -0.746 | Nucleus |
| AsWRKY53 | ASE14G00609 | IIc | 266 | 29166.56 | 6.99 | 58.26 | 59.06 | -0.788 | Nucleus |
| AsWRKY54 | ASE14G00870 | III | 228 | 25672.81 | 8.42 | 44.67 | 63.38 | -0.809 | Nucleus |
| AsWRKY55 | ASE14G00949 | IIc | 241 | 27199.86 | 9.61 | 42.69 | 68.38 | -0.63 | Nucleus |
| AsWRKY56 | ASE14G00951 | IIc | 244 | 27762.92 | 9.75 | 47.88 | 82.7 | -0.463 | Nucleus |
| AsWRKY57 | ASE15G00410 | IIc | 316 | 35602.67 | 9.53 | 73.33 | 73.48 | -0.525 | Nucleus |
| AsWRKY58 | ASE16G00074 | IIc | 193 | 22366.5 | 9.8 | 41.42 | 52.95 | -1.01 | Nucleus |
| AsWRKY59 | ASE16G00348 | I | 532 | 58202.17 | 8.33 | 58.36 | 53.78 | -0.816 | Nucleus |
| AsWRKY60 | ASE18G00298 | IIe | 187 | 21848.51 | 9.5 | 37.77 | 81.93 | -0.322 | Nucleus |
| AsWRKY61 | ASE18G00609 | IIb | 458 | 49888.18 | 5.39 | 52.59 | 67.42 | -0.483 | Nucleus |
| AsWRKY62 | ASE00G00338 | I | 665 | 72967.68 | 5.73 | 56.36 | 56.2 | -0.666 | Nucleus |
